# Supplementary material
Source: Research Square preprint supplement (doi:10.21203/rs.3.rs-9233027/v1)
Supplement: Supplementary file 1 [file f4b71de43060747addb96c12.docx]

**Supplementary information**

**Breaking the wear resistance dilemma of nanograined metals with dispersive internal gradient heterostructure**

Zhaoshuo Chen1†, Xianzhi Bian1†, Yan Lin, Fei Liang1*, Yuntian Zhu2*, Xiang Chen1*

1 Nano and Heterogeneous Materials Center, School of Materials Science and Engineering, Nanjing University of Science and Technology, Nanjing, China

2 Department of Materials Science and Engineering, City University of Hong Kong, Hong Kong, China

†These authors contributed equally to this work.

*Corresponding author. E-mail: fliang@njust.edu.cn; yuntizhu@cityu.edu.hk; xiang.chen@njust.edu.cn.

**Table of Contents**

Supplementary Fig. 1 1

Supplementary Fig. 2 2 Supplementary Fig. 3 3

Supplementary Fig. 4 4

Supplementary Fig. 5 5

Supplementary Fig. 6 6

Supplementary Fig. 7 7

Supplementary Fig. 8 8

Supplementary Fig. 9 9


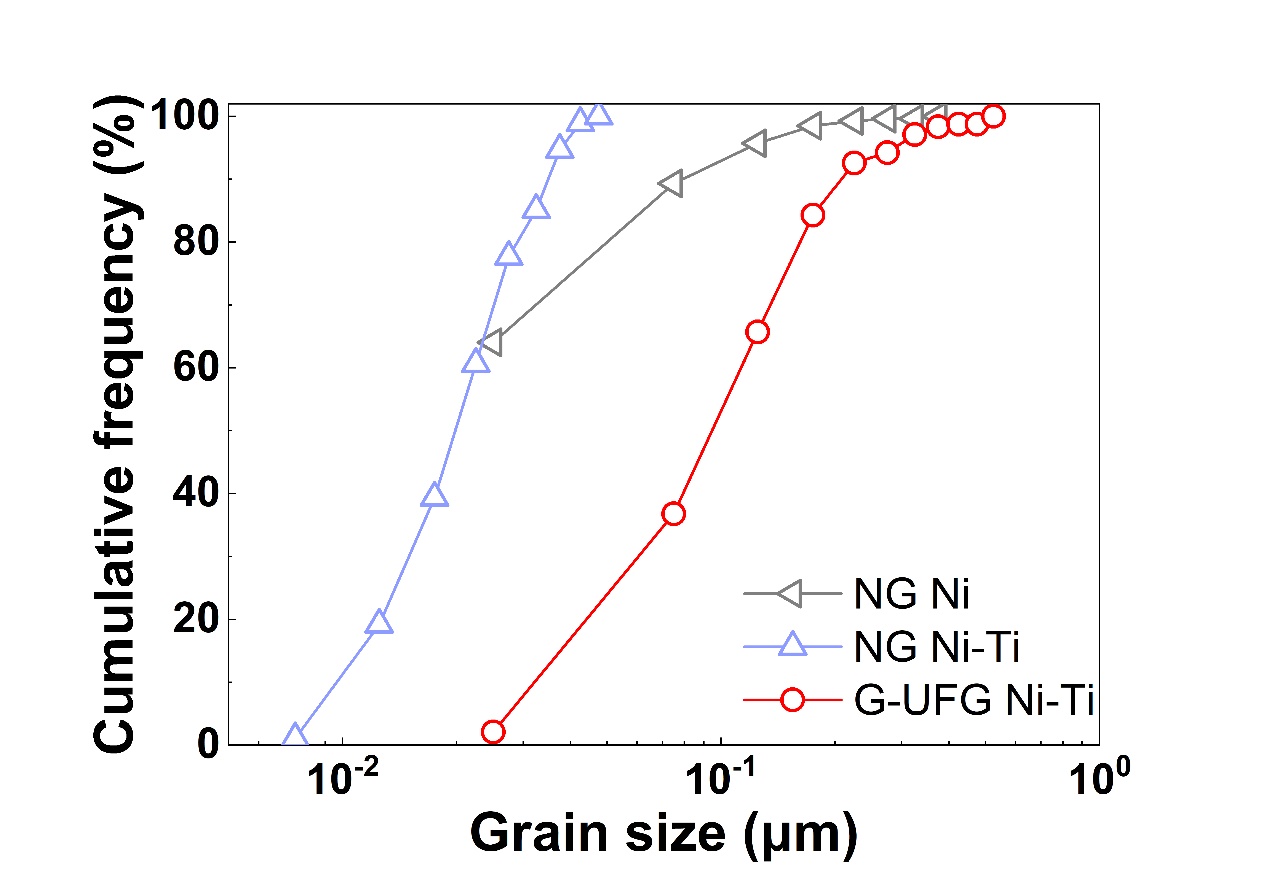


**Supplementary Fig. 1.** **Statistical results of grain size for the as-deposited states.** Cumulative frequency distribution of grain sizes in NG Ni, NG Ni-Ti and G-UFG Ni-Ti.


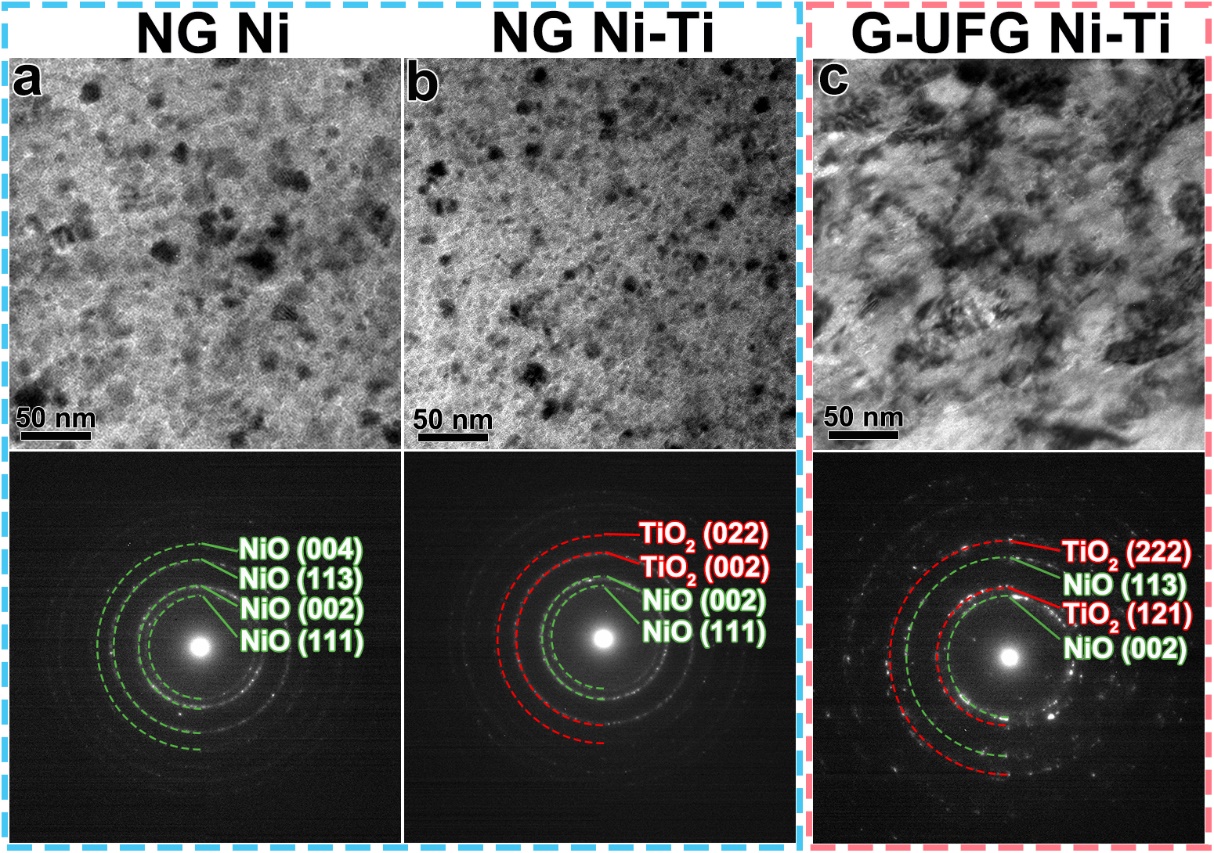


**Supplementary Fig. 2.** **Microstructure characterization of tribolayers formed at room temperature.** **a-c**, TEM images and corresponding selected area diffraction patterns in tribolayers of (**a**) NG Ni, (**b**) NG Ni-Ti, (**c**) G-UFG Ni-Ti worn at 25 ℃.


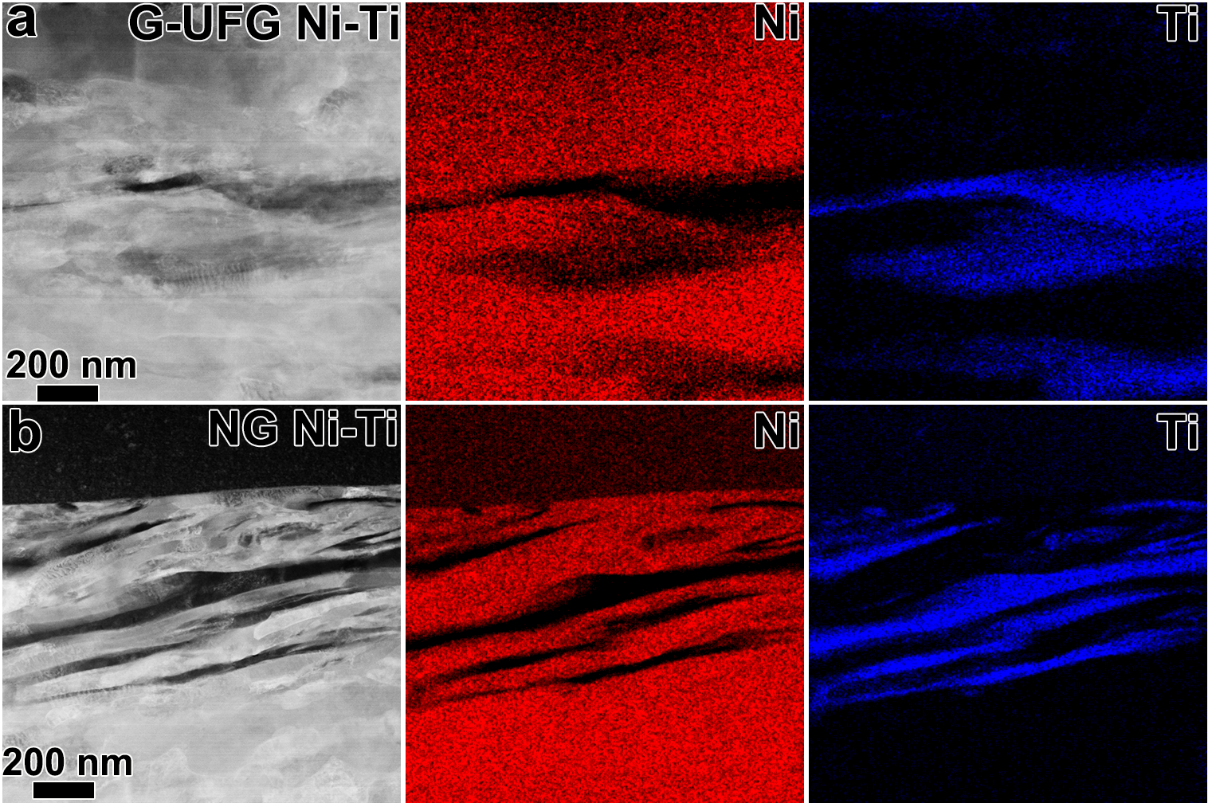


**Supplementary Fig. 3. Tribo-induced thinning of Ti particle at room temperature. a**,**b**,STEM images and corresponding EDS mapping results of refined Ti lamellae in the subsurface DRX layer of (**a**) G-UFG Ni-Ti and (**b**) NG Ni-Ti worn at 25 ℃.


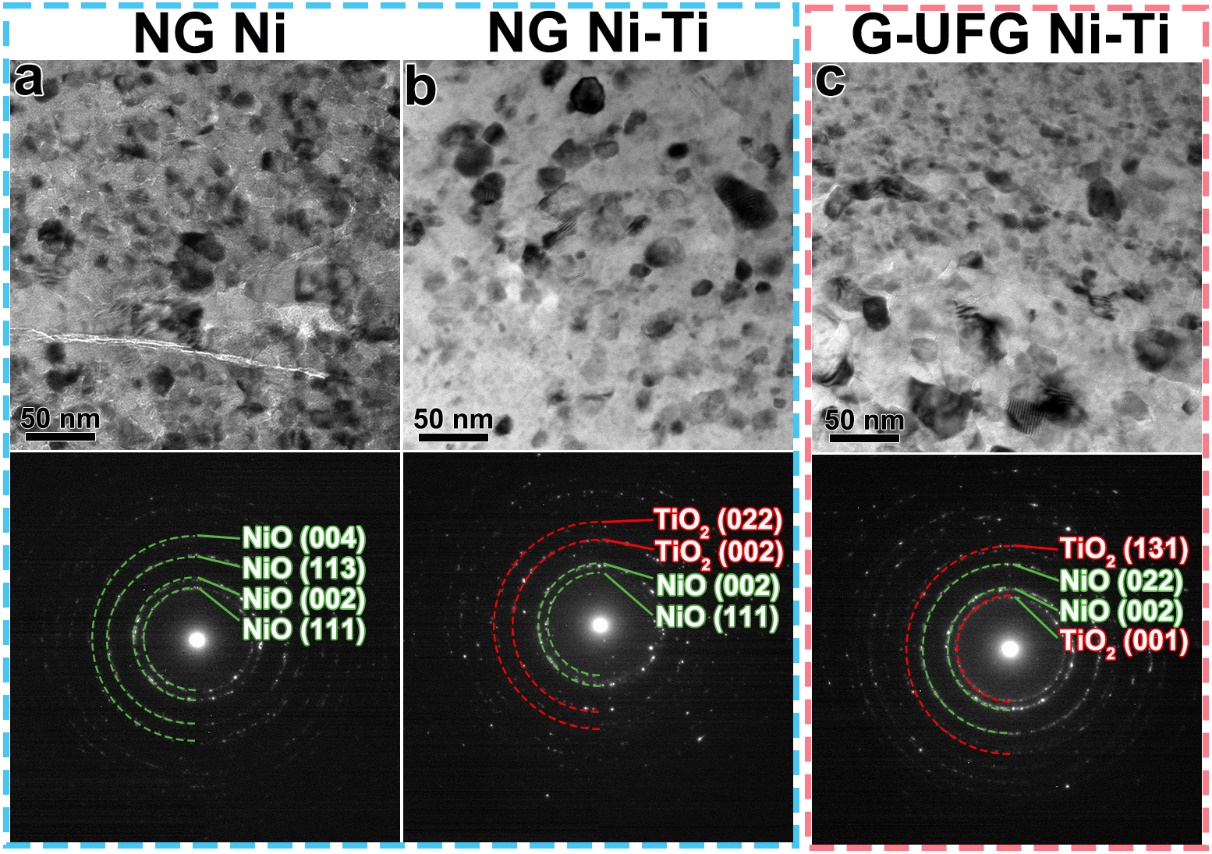


**Supplementary Fig. 4.** **Microstructure characterization of tribolayers formed at high temperature. a-c**,TEM images and corresponding selected area diffraction patterns in tribolayers of (**a**) NG Ni, (**b**) NG Ni-Ti, (**c**) G-UFG Ni-Ti worn at 800 ℃.


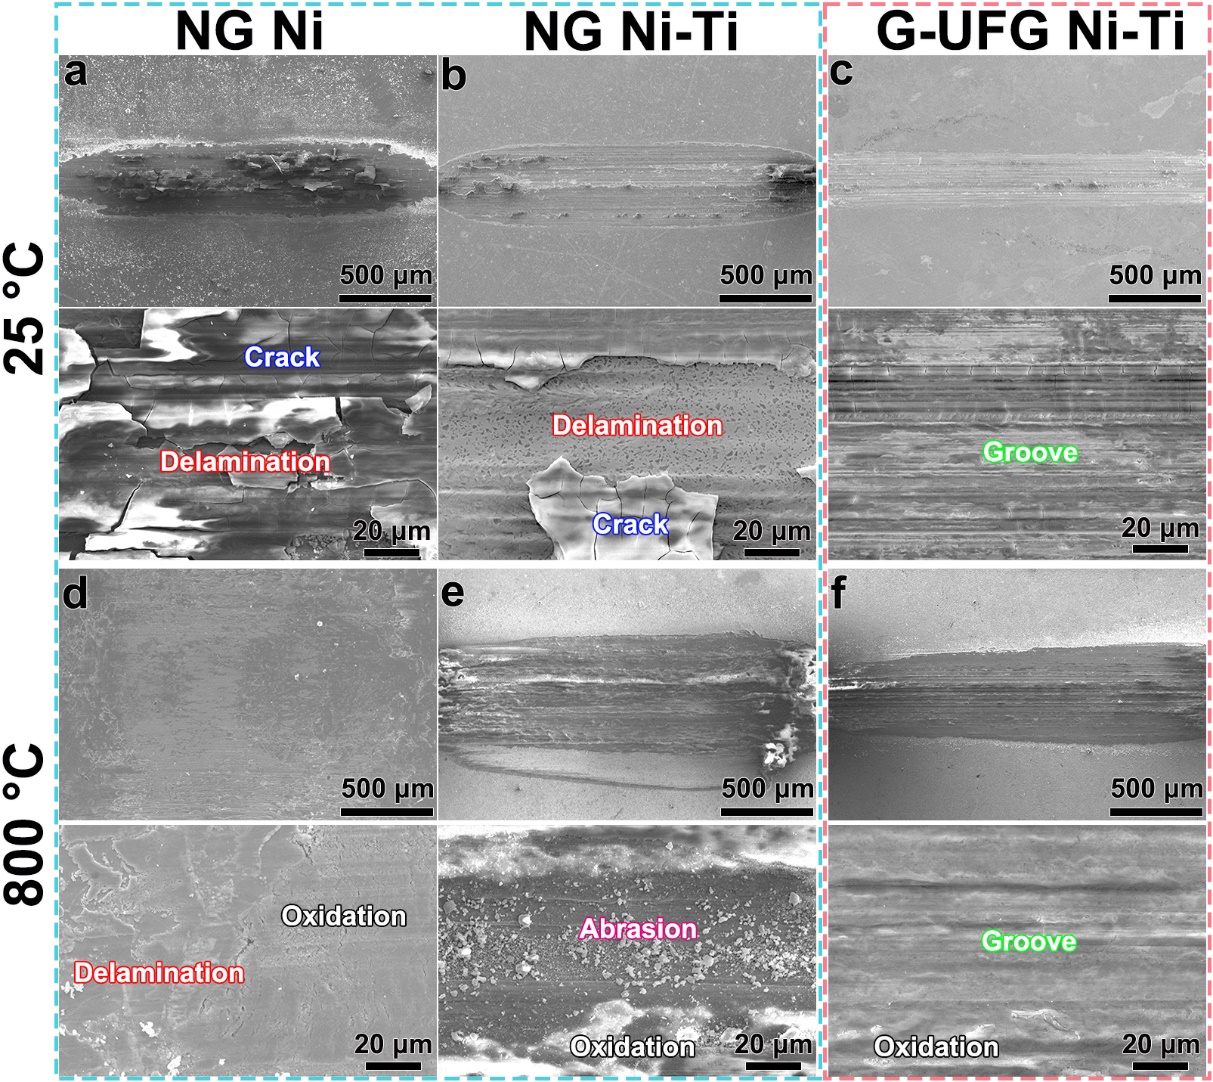


**Supplementary Fig. 5. Surface morphology characterization of wear scars at room and high temperature.** SEM images of typical wear scars for (**a, d**) NG Ni, (**b, e**) NG Ni-Ti, (**c, f**) G-UFG Ni-Ti worn at (**a-c**) 25 ℃ and (**d-f**) 800 ℃.


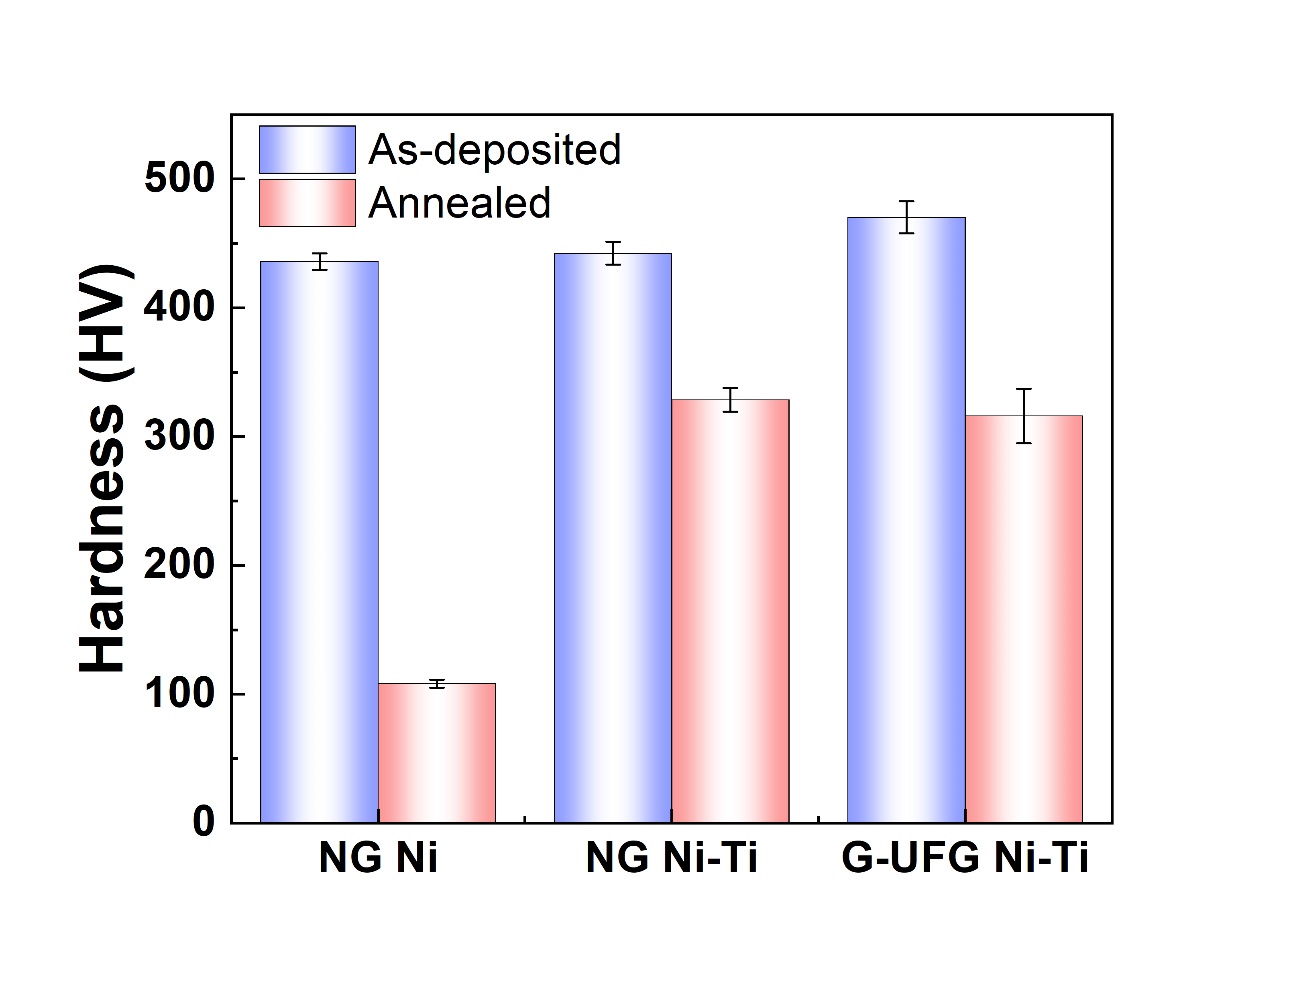


**Supplementary Fig. 6.** **Mechanical characterization for the as-deposited and annealed states.** Hardnesses of NG Ni, NG Ni-Ti and G-UFG Ni-Ti before and after annealing at 800 ℃.


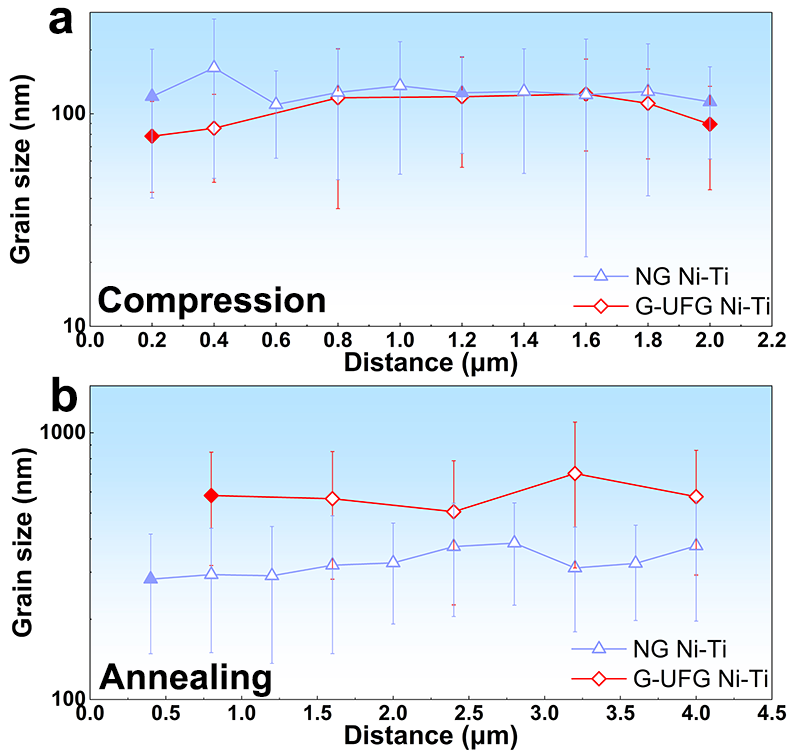


**Supplementary Fig. 7.** **Grain growth behavior of the Ni matrix adjacent to Ti particles in compressed and annealed states. a**, Grain size distribution of the Ni matrix as a function of distance within ~3 μm from the tops of compressed pillars for NG Ni-Ti and G-UFG Ni-Ti. **b**, Grain size distribution of the Ni matrix as a function of distance for annealed NG Ni-Ti and G-UFG Ni-Ti. The solid points represent the locations of Ti particles.

**
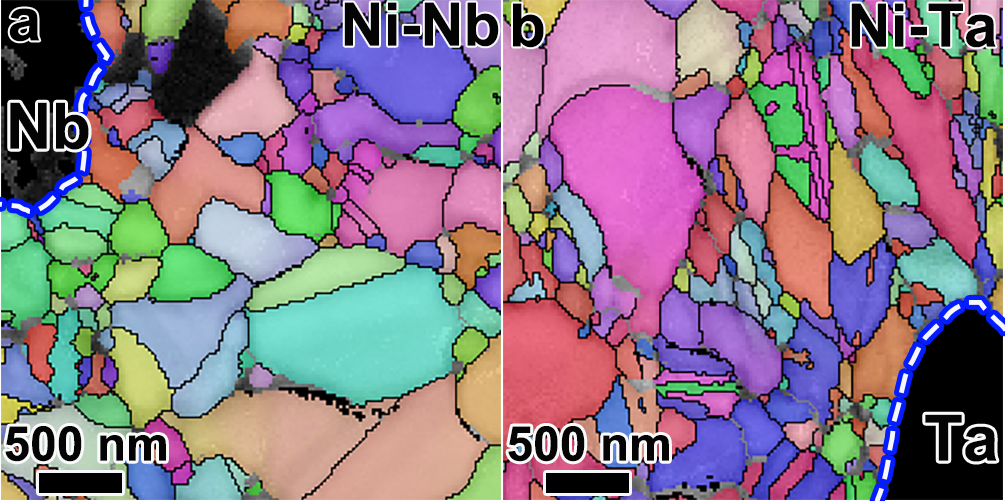
**

**Supplementary Fig. 8. Microstructure characterization of the as-deposited Ni-Nb and Ni-Ta. a**,**b**,Inverse pole figures of the gradient nanograined Ni adjacent to (**a**) Nb and (**b**) Ta particles.


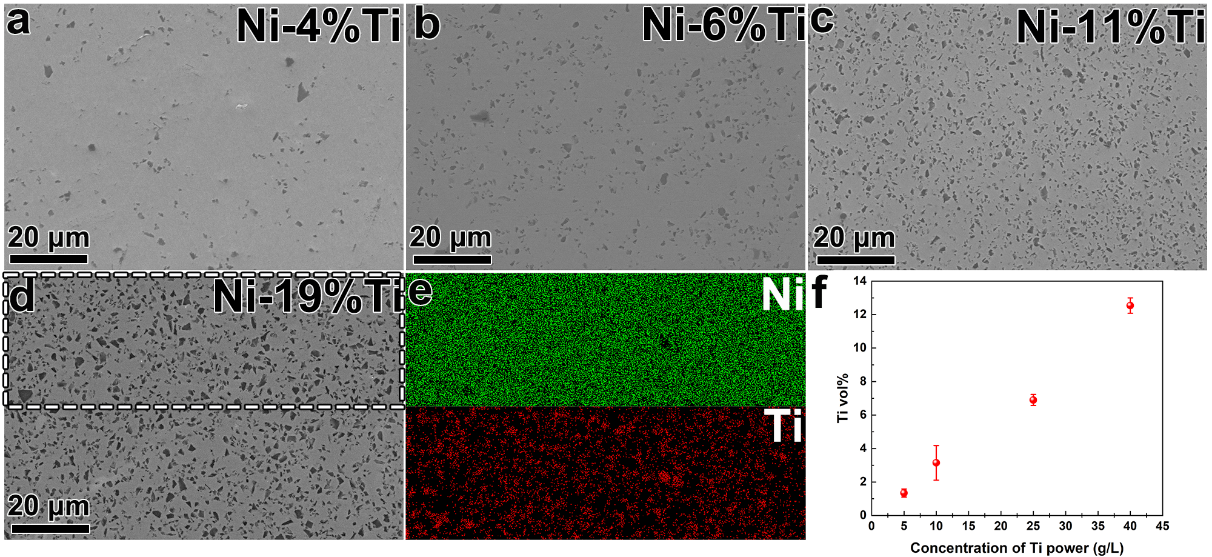


**Supplementary Fig. 9.** **In-plane characterization of the as-deposited Ni-Ti samples.** **a-d**, SEM images of as-deposited (**a**) Ni-4%Ti, (**b**) Ni-6%Ti, (**c**) Ni-11%Ti, (**d**) Ni-19%Ti. **e**, The EDS mapping depicts the distribution of Ni and Ti element in Ni-19%Ti. **f**, The variation of Ti particle volume fraction in Ni-Ti samples versus the concentration of Ti particles in the electrodeposition solution.
